# Supplementary material
Source: publisher site journal article supplement (https://www.dovepress.com/article/353814)
Supplement: Supplementary file 1 [file get_supplementary_file.php]

**Supplemental Table 1.** Concurrent antimicrobial therapy during pharmacological interventions for *Clostridioides difficile* infection (CDI) stratified by the in-hospital outcome.

| Variables | Total n=235 | Outcome | | *P* value |
| --- | --- | --- | --- | --- |
| Survival, n=177 | Fatality, n=58 |  |
| Cephalosporins | 118 (50.2) | 88 (49.7) | 30 (51.7) | 0.88 |
| Cefazolin, iv | 3 (1.3) | 3 (1.7) | 0 | 1.00 |
| Cefuroxime, iv/o | 14 (6.0) | 12 (6.8) | 2 (3.4) | 0.53 |
| Ceftazidime or ceftriaxone, iv | 62 (26.4) | 48 (27.1) | 14 (24.1) | 0.73 |
| Cefepime, iv | 34 (14.5) | 23 (13.0) | 11 (19.0) | 0.28 |
| Penicillins, iv | 27 (11.5) | 17 (9.6) | 10 (17.2) | 0.15 |
| Carbapenem, iv | 49 (20.9) | 37 (20.9) | 12 (20.7) | 1.00 |
| Fluoroquinolones, iv/o | 11 (4.7) | 7 (4.0) | 4 (6.9) | 0.47 |
| Glycopeptide, iv | 34 (14.5) | 25 (14.1) | 9 (15.5) | 0.83 |

Note: iv = intravenous; o = oral.
